# Supplementary material for: Genetic Dissection of the Regulatory Mechanisms of Ace2 in the Infected Mouse Lung
Source: Front Immunol. 2021 Jan 8;11:607314. doi: 10.3389/fimmu.2020.607314 (PMC7819859; doi:10.3389/fimmu.2020.607314)
Supplement: Supplementary file 2 [file Table_2.xlsx]

## Sheet: Sheet2
Index	ProbeSetID	Symbol	Gene_ID	Description	Chr	Pos_start	Pearson correlation to Ace2(r)	Pearson correlation to Ace2(p)	Differential Expression (Log2FC)	Differential Expression (padj)	WGCNA Module	cis-eQTL	trans-eQTL	functional Variant	cilium physiology
1	ENSMUSG00000025900	Rp1	19888	retinitis pigmentosa 1 (autosomal dominant)	1	4.34448	0.351479	0.0202364	-0.9225	1.34705e-05	purple	-	yes	Nonsynonymous SNP	-
2	ENSMUSG00000025931	Paqr8	74229	progestin and adipoQ receptor family member VIII	1	20.9392	0.365814	0.015267	-0.432905	0.000195328	purple	-	-	Nonsynonymous SNP	-
3	ENSMUSG00000041809	Efhc1	71877	EF-hand domain (C-terminal) containing 1	1	20.9895	0.651499	8.66029e-07	-0.915981	3.77102e-11	purple	-	-	-	yes
4	ENSMUSG00000041945	Mfsd9	211798	major facilitator superfamily domain containing 9	1	40.7722	0.537223	0.000146888	-0.376828	0.0598136	purple	-	-	-	-
5	ENSMUSG00000096141	Dnahc7a	627872	dynein, axonemal, heavy chain 7A	1	53.9416	0.488435	0.000731937	-1.07899	3.74064e-05	purple	-	-	-	-
6	ENSMUSG00000047361	Gm973	381260	gene model 973, (NCBI)	1	59.5667	0.514625	0.000319838	-1.04122	5.39865e-06	purple	-	yes	-	-
7	ENSMUSG00000025963	Mdh1b	76668	malate dehydrogenase 1B, NAD (soluble)	1	63.6989	0.426829	0.0039256	-1.30626	1.01325e-05	purple	-	yes	-	-
8	ENSMUSG00000053153	Spag16	66722	sperm associated antigen 16	1	70.7248	0.691815	7.24819e-08	-1.26612	1.61104e-10	purple	-	-	-	yes
9	ENSMUSG00000039372	March4	381270	membrane-associated ring finger (C3HC4) 4, E3 ubiquitin ligase	1	72.4273	0.374872	0.012689	#N/A	#N/A	purple	-	-	-	-
10	ENSMUSG00000039354	Smarcal1	54380	Swi/SNF related matrix associated, actin dependent regulator of chromatin, subfamily a-like 1	1	72.5169	0.328025	0.0312224	-0.092669	0.592963	purple	yes	-	Nonsynonymous SNP	-
11	ENSMUSG00000053161	Wdr69	71227	WD repeat domain 69	1	83.2104	0.49779	0.00054925	-0.747123	0.0216528	purple	-	-	-	-
12	ENSMUSG00000073633	Fbxo36	66153	F-box protein 36	1	84.9002	0.538917	0.000138206	-0.712889	0.00160719	purple	-	-	-	-
13	ENSMUSG00000026301	Iqca	74918	IQ motif containing with AAA domain	1	90.1038	0.616031	5.50082e-06	-1.46611	1.22901e-16	purple	-	yes	-	-
14	ENSMUSG00000034212	Ankmy1	241158	ankyrin repeat and MYND domain containing 1	1	92.8702	0.317386	0.0376061	-0.313593	0.24924	purple	-	-	-	-
15	ENSMUSG00000036962	Gm101	226356	gene model 101, (NCBI)	1	119.926	0.483517	0.000848081	-0.900157	0.000578323	purple	-	-	-	-
16	ENSMUSG00000051590	Ysk4	22625	Yeast Sps1/Ste20-related kinase 4 (S. cerevisiae)	1	127.818	0.631773	2.50455e-06	-1.34018	1.6806e-15	purple	-	yes	-	-
17	ENSMUSG00000026417	Pigr	18703	polymeric immunoglobulin receptor	1	130.852	0.614584	5.89852e-06	1.18406	1.10182e-09	purple	-	-	-	yes
18	ENSMUSG00000016526	Dyrk3	226419	dual-specificity tyrosine-(Y)-phosphorylation regulated kinase 3	1	131.128	0.45143	0.00209193	0.604537	0.00738833	purple	-	yes	-	-
19	ENSMUSG00000055547	Apobec4	71281	apolipoprotein B mRNA editing enzyme, catalytic polypeptide-like 4 (putative)	1	152.757	0.425819	0.00402404	-0.713041	0.33854	purple	-	yes	Nonsynonymous SNP	-
20	ENSMUSG00000095576	Fmo6	226565	flavin containing monooxygenase 6	1	160.986	0.380644	0.0112461	-1.38869	0.0621159	purple	-	-	-	-
21	ENSMUSG00000044835	Ankrd45	73844	ankyrin repeat domain 45	1	161.168	0.350261	0.0207145	-1.10044	8.02379e-07	purple	-	yes	-	-
22	ENSMUSG00000026578	4930455F23Rik	74895	coiled-coil domain containing 181	1	162.345	0.602416	1.04439e-05	-0.651498	0.0007112	purple	-	-	Nonsynonymous SNP	-
23	ENSMUSG00000026691	Fmo3	14262	flavin containing monooxygenase 3	1	162.917	0.620296	4.46704e-06	-0.764058	0.000108999	purple	-	-	Nonsynonymous SNP	-
24	ENSMUSG00000026575	Nme7	171567	non-metastatic cells 7, protein expressed in	1	164.328	0.473547	0.00113462	-0.208757	0.268529	purple	-	-	-	yes
25	ENSMUSG00000070532	1700084C01Rik	78465	RIKEN cDNA 1700084C01 gene	1	168	0.313598	0.0401201	-0.350365	0.511014	purple	-	yes	-	-
26	ENSMUSG00000045259	Klhdc9	68874	kelch domain containing 9	1	171.36	0.306262	0.0453723	-0.54094	0.361814	purple	-	-	Nonsynonymous SNP	-
27	ENSMUSG00000026546	Ccdc19	71870	coiled-coil domain containing 19	1	172.546	0.500323	0.000507365	-0.0945728	0.782976	purple	-	-	-	-
28	ENSMUSG00000055067	Smyd3	69726	SET and MYND domain containing 3	1	179.395	0.32634	0.0321697	-0.703016	1.41459e-06	purple	-	-	-	-
29	ENSMUSG00000050625	Ccdc121	403180	coiled-coil domain containing 121	1	181.51	0.430913	0.00354857	-0.436444	0.172359	purple	-	-	Nonsynonymous SNP	-
30	ENSMUSG00000026621	Mosc1	66112	MOCO sulphurase C-terminal domain containing 1	1	184.795	0.354664	0.0190296	-1.06444	0.0429899	purple	-	-	-	-
31	ENSMUSG00000026610	Esrrg	26381	estrogen-related receptor gamma	1	188.214	0.400832	0.00723879	-1.4773	1.07918e-10	purple	-	yes	-	-
32	ENSMUSG00000037474	Dtl	76843	denticleless homolog (Drosophila)	1	189.713	0.363483	0.0159971	0.00498779	0.98701	purple	-	yes	-	-
33	ENSMUSG00000026622	Nek2	18005	NIMA (never in mitosis gene a)-related expressed kinase 2	1	191.833	0.536046	0.000153204	-0.195493	0.473855	purple	-	-	Nonsynonymous SNP	-
34	ENSMUSG00000026650	Meig1	104362	meiosis expressed gene 1	2	3.40914	0.30624	0.0453887	-0.153686	0.715236	purple	-	-	-	yes
35	ENSMUSG00000003418	St8sia6	241230	ST8 alpha-N-acetyl-neuraminide alpha-2,8-sialyltransferase 6	2	13.6549	0.554947	7.62085e-05	-0.676513	4.93384e-05	purple	-	-	-	-
36	ENSMUSG00000037683	Armc3		Armc3	2	19.3063	0.599449	1.19551e-05	-1.09031	9.54876e-10	purple	yes	-	Nonsynonymous SNP	-
37	ENSMUSG00000026961	Lrrc26	227618	leucine rich repeat containing 26	2	25.2909	0.485309	0.000803983	-0.398632	0.312523	purple	-	-	-	-
38	ENSMUSG00000048038	4932418E24Rik	329366	RIKEN cDNA 4932418E24 gene	2	26.2718	0.377956	0.0118998	-1.1811	3.81546e-08	purple	-	-	Nonsynonymous SNP	-
39	ENSMUSG00000026831	1700007K13Rik	69327	RIKEN cDNA 1700007K13 gene	2	28.4651	0.455458	0.00187762	-0.4579	0.174239	purple	-	-	-	-
40	ENSMUSG00000026809	1700026L06Rik	69987	RIKEN cDNA 1700026L06 gene	2	28.6929	0.38791	0.00962886	0.324384	0.491989	purple	-	-	-	-
41	ENSMUSG00000026807	Ak8	68870	adenylate kinase 8	2	28.8867	0.529252	0.000194676	-0.7745	0.00227662	purple	-	-	-	-
42	ENSMUSG00000079502	1700101E01Rik	329375	RIKEN cDNA 1700101E01 gene	2	29.1964	0.558588	6.62436e-05	-0.738565	0.0454238	purple	-	-	-	-
43	ENSMUSG00000039715	Wdr34	71820	WD repeat domain 34	2	30.0319	0.352376	0.0198904	-0.372704	0.0597687	purple	-	-	-	-
44	ENSMUSG00000039021	Ttc16	338348	tetratricopeptide repeat domain 16	2	32.7644	0.594869	1.46832e-05	-1.07075	5.80457e-08	purple	-	-	-	-
45	ENSMUSG00000047250	Ptgs1	19224	prostaglandin-endoperoxide synthase 1	2	36.2492	0.356174	0.0184789	0.32379	0.0745448	purple	-	-	-	yes
46	ENSMUSG00000026828	Galnt5	241391	UDP-N-acetyl-alpha-D-galactosamine:polypeptide N-acetylgalactosaminyltransferase 5	2	58.0457	0.720578	9.26381e-09	-1.05687	3.07899e-05	purple	-	yes	-	-
47	ENSMUSG00000026888	Grb14	50915	growth factor receptor bound protein 14	2	64.9366	0.306653	0.0450791	-1.09886	3.06059e-07	purple	-	yes	-	-
48	ENSMUSG00000075302	4933404M02Rik	66748	RIKEN cDNA 4933404M02 gene	2	70.5408	0.518861	0.000277735	-0.363623	0.322234	purple	-	-	Nonsynonymous SNP	-
49	ENSMUSG00000075273	Ttc30b	72421	tetratricopeptide repeat domain 30B	2	75.9362	0.534841	0.000159921	-0.702801	0.000591394	purple	-	-	-	-
50	ENSMUSG00000040812	Agbl2	271813	ATP/GTP binding protein-like 2	2	90.8292	0.501164	0.000494094	-0.959549	7.23624e-11	purple	-	-	-	-
51	ENSMUSG00000012350	Ehf	13661	ets homologous factor	2	103.263	0.659265	5.55828e-07	-0.236341	0.0532925	purple	-	yes	Nonsynonymous SNP	-
52	ENSMUSG00000027186	Elf5	13711	E74-like factor 5	2	103.424	0.534614	0.000161216	-0.765933	5.20089e-06	purple	-	-	-	-
53	ENSMUSG00000027344	Fsip1	71313	fibrous sheath-interacting protein 1	2	118.245	0.558883	6.54903e-05	-0.871129	0.00259281	purple	-	-	Nonsynonymous SNP	-
54	ENSMUSG00000027317	Ppp1r14d	72112	protein phosphatase 1, regulatory (inhibitor) subunit 14D	2	119.218	0.358894	0.0175204	1.42354	1.78624e-07	purple	-	-	Nonsynonymous SNP	-
55	ENSMUSG00000027359	Slc27a2	26458	solute carrier family 27 (fatty acid transporter), member 2	2	126.586	0.330953	0.0296298	-0.815816	0.00505718	purple	-	-	Nonsynonymous SNP	-
56	ENSMUSG00000034906	Ncaph	215387	non-SMC condensin I complex, subunit H	2	127.104	0.432931	0.00337417	-0.337654	0.147412	purple	-	-	Nonsynonymous SNP	-
57	ENSMUSG00000037259	Dzank1	241688	double zinc ribbon and ankyrin repeat-containing protein 1	2	144.471	0.336151	0.0269673	#N/A	#N/A	purple	-	-	-	-
58	ENSMUSG00000032680	6820408C15Rik	228778	RIKEN cDNA 6820408C15 gene	2	152.444	0.554341	7.79933e-05	-0.791365	0.000184909	purple	-	-	-	-
59	ENSMUSG00000074673	Ttll9	74711	tubulin tyrosine ligase-like family, member 9	2	153.002	0.399321	0.00748891	-1.41934	5.80457e-08	purple	-	-	-	-
60	ENSMUSG00000027485	Bpifb1	228801	BPI fold containing family B, member 1	2	154.375	0.504955	0.000438032	0.164447	0.614049	purple	-	yes	Nonsynonymous SNP	-
61	ENSMUSG00000038572	Bpifb5	228802	BPI fold containing family B, member 5	2	154.398	0.421057	0.00451736	0.0437624	0.859782	purple	yes	-	Nonsynonymous SNP	-
62	ENSMUSG00000013338	Fer1l4	74562	fer-1-like 4 (C. elegans)	2	156.019	0.485813	0.000791954	-0.457643	0.18012	purple	-	-	-	-
63	ENSMUSG00000074625	Arhgap40	545481	Rho GTPase activating protein 40	2	158.716	0.415062	0.00521204	-0.132401	0.652937	purple	yes	-	Nonsynonymous SNP	-
64	ENSMUSG00000037754	Ppp1r16b	228852	protein phosphatase 1, regulatory (inhibitor) subunit 16B	2	158.763	0.472366	0.00117368	-0.501702	0.000201587	purple	yes	-	-	-
65	ENSMUSG00000017723	Wfdc2	67701	WAP four-disulfide core domain 2	2	164.568	0.4328	0.00338529	0.454087	0.109894	purple	-	-	-	-
66	ENSMUSG00000013523	Bcas1	76960	breast carcinoma amplified sequence 1	2	170.347	0.669884	2.95555e-07	-1.29608	2.32401e-15	purple	-	-	Nonsynonymous SNP	-
67	ENSMUSG00000027496	Aurka	20878	serine/threonine kinase 6	2	172.356	0.400883	0.00723036	0.603902	0.0236198	purple	-	-	-	yes
68	ENSMUSG00000027524	Edn3	13616	endothelin 3	2	174.77	0.367739	0.0146853	-1.10599	5.05726e-09	purple	-	-	-	-
69	ENSMUSG00000038980	BC066135	271887	RBBP8 N-terminal like	2	180.543	0.427516	0.00385989	-0.841415	0.0559123	purple	-	yes	-	-
70	ENSMUSG00000058921	Slc10a5	241877	solute carrier family 10 (sodium/bile acid cotransporter family), member 5	3	10.3344	0.739343	1.99361e-09	-1.71605	4.96716e-16	purple	-	-	Nonsynonymous SNP	-
71	ENSMUSG00000043164	Tmem212	208613	transmembrane protein 212	3	27.9671	0.542196	0.000122706	0.221235	0.54109	purple	-	-	-	-
72	ENSMUSG00000037610	Kcnmb2	72413	potassium large conductance calcium-activated channel, subfamily M, beta member 2	3	31.9028	0.727344	5.41807e-09	-1.32548	4.27114e-13	purple	-	-	Nonsynonymous SNP	-
73	ENSMUSG00000027676	Ccdc39	51938	coiled-coil domain containing 39	3	33.8124	0.414198	0.00531938	-1.30102	1.14516e-13	purple	-	-	-	yes
74	ENSMUSG00000036834	Plch1	269437	phospholipase C, eta 1	3	63.6963	0.669293	3.06375e-07	-0.657749	0.00120036	purple	-	-	-	-
75	ENSMUSG00000034151	Zbbx	213234	zinc finger, B-box domain containing	3	75.3082	0.478737	0.000976277	-1.57422	1.60178e-07	purple	-	-	Nonsynonymous SNP	-
76	ENSMUSG00000027955	Fam198b	68659	family with sequence similarity 198, member B	3	80.082	0.41229	0.00556318	-1.07473	2.97501e-11	purple	-	-	-	-
77	ENSMUSG00000033860	Fgg	99571	fibrinogen, gamma polypeptide	3	83.0149	0.520754	0.000260574	1.63961	0.000302685	purple	-	yes	Nonsynonymous SNP	-
78	ENSMUSG00000041842	Fhdc1	229474	FH2 domain containing 1	3	84.6706	0.519309	0.000273591	-1.03064	1.02021e-13	purple	-	-	-	-
79	ENSMUSG00000051000	Fam160a1	229488	family with sequence similarity 160, member A1	3	85.8561	0.497603	0.000552468	-0.214398	0.0488369	purple	-	yes	-	-
80	ENSMUSG00000004892	Bcan	12032	brevican	3	87.9879	0.366434	0.0150776	-2.01182	5.74167e-14	purple	-	-	-	-
81	ENSMUSG00000027938	Creb3l4	78284	cAMP responsive element binding protein 3-like 4	3	90.2376	0.552638	8.32108e-05	-0.299647	0.415605	purple	-	yes	-	-
82	ENSMUSG00000027942	4933434E20Rik	99650	RIKEN cDNA 4933434E20 gene	3	90.2547	0.62632	3.30844e-06	0.238054	0.305159	purple	-	yes	-	-
83	ENSMUSG00000028139	Riiad1	66353	regulatory subunit of type II PKA R-subunit (RIIa) domain containing 1	3	94.6638	0.712165	1.71293e-08	-0.85253	0.000266524	purple	-	-	-	-
84	ENSMUSG00000068876	Cgn	70737	cingulin	3	94.7731	0.330456	0.0298954	-0.0731726	0.778237	purple	-	-	Nonsynonymous SNP	-
85	ENSMUSG00000027867	Spag17	74362	sperm associated antigen 17	3	100.051	0.642328	1.43479e-06	-1.28823	9.27064e-13	purple	-	-	-	yes
86	ENSMUSG00000051076	Vtcn1	242122	V-set domain containing T cell activation inhibitor 1	3	100.895	0.659236	5.56763e-07	-0.576975	0.000977849	purple	-	-	Nonsynonymous SNP	-
87	ENSMUSG00000033147	Slc22a15	242126	solute carrier family 22 (organic anion/cation transporter), member 15	3	101.859	0.381963	0.0109364	-0.135771	0.33476	purple	-	-	-	-
88	ENSMUSG00000010136	1700027A23Rik	76420	RIKEN cDNA 1700027A23 gene	3	105.997	0.618322	4.92107e-06	-0.360298	0.11629	purple	-	-	Nonsynonymous SNP	-
89	ENSMUSG00000068762	Gstm6	14867	glutathione S-transferase, mu 6	3	107.941	0.344344	0.0231716	-0.805245	6.69812e-05	purple	-	yes	-	-
90	ENSMUSG00000027886	1700013F07Rik	75504	RIKEN cDNA 1700013F07 gene	3	108.545	0.52044	0.000263356	-0.0226809	0.957964	purple	-	-	-	-
91	ENSMUSG00000040412	5330417C22Rik	229722	RIKEN cDNA 5330417C22 gene	3	108.665	0.669576	3.01144e-07	-0.764852	2.1099e-07	purple	-	-	-	-
92	ENSMUSG00000045326	Fndc7	320181	fibronectin type 3 domain-containing protein 7	3	108.856	0.449642	0.00219369	0.192593	0.410759	purple	-	yes	-	-
93	ENSMUSG00000033502	Cdc14a	229776	CDC14 cell division cycle 14 homolog A (S. cerevisiae)	3	116.273	0.65212	8.36329e-07	-0.763127	3.87684e-10	purple	-	-	-	-
94	ENSMUSG00000058952	Cfi	12630	complement component factor i	3	129.875	0.356839	0.0182407	0.26756	0.504171	purple	-	yes	Nonsynonymous SNP	-
95	ENSMUSG00000028255	Clca3	23844	chloride channel calcium activated 3	3	145.005	0.390444	0.0091135	-0.0892575	0.929094	purple	-	-	-	-
96	ENSMUSG00000043020	Wdr63	242253	WD repeat domain 63	3	146.041	0.592216	1.65129e-05	-1.02353	8.66534e-08	purple	-	-	-	-
97	ENSMUSG00000036832	Lpar3	65086	lysophosphatidic acid receptor 3	3	146.558	0.627545	3.10951e-06	-0.575454	0.00827648	purple	-	-	-	-
98	ENSMUSG00000078161	BC007180	102643138		3	155.099	0.43544	0.00316776	#N/A	#N/A	purple	-	-	Nonsynonymous SNP	-
99	ENSMUSG00000028294	1700003M02Rik	69329	RIKEN cDNA 1700003M02 gene	4	34.6889	0.512464	0.000343443	-0.927745	2.36354e-06	purple	-	yes	-	-
100	ENSMUSG00000073910	Mob3b	214944	Mps One Binder kinase activator 3B	4	34.9533	0.656441	6.54226e-07	-0.682644	2.82798e-05	purple	-	-	-	-
101	ENSMUSG00000028438	Kif24	109242	kinesin family member 24	4	41.3935	0.483258	0.000854614	-0.308096	0.0470457	purple	-	-	Nonsynonymous SNP	-
102	ENSMUSG00000028441	1110017D15Rik	73721	RIKEN cDNA 1110017D15 gene	4	41.5051	0.37221	0.0134055	0.0273548	0.947658	purple	-	-	-	-
103	ENSMUSG00000061322	Dnaic1	68922	dynein, axonemal, intermediate chain 1	4	41.635	0.509388	0.000379725	-1.06567	3.6669e-08	purple	-	-	-	yes
104	ENSMUSG00000028457	Atp8b5	320571	ATPase, class I, type 8B, member 5	4	43.2543	0.401849	0.00707433	-1.11452	0.00890908	purple	-	-	Nonsynonymous SNP	-
105	ENSMUSG00000066196	Spag8	433700	sperm associated antigen 8	4	43.6602	0.594928	1.46447e-05	-0.610513	0.00159722	purple	-	-	-	-
106	ENSMUSG00000035539	E230008N13Rik	381522	RIKEN cDNA E230008N13 gene	4	45.9015	0.381525	0.0110383	-1.0173	1.16681e-08	purple	-	-	Nonsynonymous SNP	-
107	ENSMUSG00000070985	Acnat1	230161	acyl-coenzyme A amino acid N-acyltransferase 1	4	49.4459	0.389511	0.00930059	-0.815152	0.155897	purple	-	-	-	-
108	ENSMUSG00000028434	Epb4.1l4b	54357	erythrocyte protein band 4.1-like 4b	4	57.062	0.465376	0.00142995	-0.859577	1.07537e-07	purple	-	-	Nonsynonymous SNP	-
109	ENSMUSG00000052117	D630039A03Rik	242484	RIKEN cDNA D630039A03 gene	4	57.9086	0.624291	3.66348e-06	-0.546311	0.00205016	purple	-	-	-	-
110	ENSMUSG00000028391	Wdr31	71354	WD repeat domain 31	4	62.4621	0.497053	0.000562013	-0.219274	0.512517	purple	-	-	-	-
111	ENSMUSG00000061540	Orm2	18406	orosomucoid 2	4	63.3639	0.367579	0.0147328	5.60613	3.15832e-24	purple	-	-	-	-
112	ENSMUSG00000028488	Sh3gl2	20404	endophilin A1, SH3-domain GRB2-like 2	4	85.3893	0.437053	0.00304092	-1.3972	5.67068e-13	purple	-	yes	Nonsynonymous SNP	-
113	ENSMUSG00000066113	Adamtsl1	77739	ADAMTS-like 1	4	86.2342	0.490348	0.000690708	0.120711	0.4188	purple	-	-	Nonsynonymous SNP	-
114	ENSMUSG00000028573	Fggy	75578	FGGY carbohydrate kinase domain containing	4	95.8214	0.457483	0.0017774	-0.0651409	0.87342	purple	-	yes	-	-
115	ENSMUSG00000015224	Cyp2j9	74519	cytochrome P450, family 2, subfamily j, polypeptide 9	4	96.577	0.434855	0.00321487	-0.696899	0.000411561	purple	-	-	-	-
116	ENSMUSG00000078639	Gm12695	620779	predicted gene 12695	4	97.057	0.655256	7.00139e-07	-1.72767	1.49498e-11	purple	-	yes	-	-
117	ENSMUSG00000035126	Wdr78	242584	WD repeat domain 78	4	103.038	0.635092	2.10777e-06	-0.809	0.000213966	purple	-	-	-	-
118	ENSMUSG00000028621	Cyb5rl	230582	cytochrome b5 reductase-like	4	107.398	0.370956	0.0137545	-0.837346	2.26252e-05	purple	-	-	-	-
119	ENSMUSG00000070877	Ldlrad1	546840	low density lipoprotein receptor class A domain containing 1	4	107.537	0.571889	3.90526e-05	-0.920729	1.22372e-06	purple	-	-	-	-
120	ENSMUSG00000028555	Ttc39a	230603	tetratricopeptide repeat domain 39A	4	109.748	0.6897	8.35343e-08	-0.373716	0.0146133	purple	yes	-	-	-
121	ENSMUSG00000078597	Cyp4a12b	13118	cytochrome P450, family 4, subfamily a, polypeptide 12B	4	115.739	0.333829	0.0281313	-2.836	8.08147e-07	purple	-	yes	Nonsynonymous SNP	-
122	ENSMUSG00000028699	Tspan1	66805	tetraspanin 1	4	116.162	0.746754	1.03992e-09	-0.059239	0.772176	purple	-	-	-	-
123	ENSMUSG00000034035	Ccdc17	622665	coiled-coil domain containing 17	4	116.926	0.389274	0.00934845	-0.941443	3.8387e-10	purple	yes	-	-	-
124	ENSMUSG00000060268	Gm1661	381543	gene model 1661, (NCBI)	4	117.216	0.396627	0.00795353	-0.956261	0.00220778	purple	yes	-	-	-
125	ENSMUSG00000047671	Tctex1d4	242646	Tctex1 domain containing 4	4	117.455	0.35697	0.0181941	-0.0925203	0.758113	purple	-	-	-	-
126	ENSMUSG00000078588	Ccdc24	381546	coiled-coil domain containing 24	4	117.87	0.527393	0.00020765	-0.575688	0.00270421	purple	-	-	-	-
127	ENSMUSG00000028730	Wdr65	384050	WD repeat domain 65	4	118.8	0.520519	0.000262659	-1.21577	2.37261e-06	purple	-	-	-	-
128	ENSMUSG00000028637	Ccdc30	73332	coiled-coil domain containing 30	4	119.72	0.34015	0.0250552	-0.71154	0.0427317	purple	-	yes	Nonsynonymous SNP	-
129	ENSMUSG00000028654	Mycl1	16918	v-myc myelocytomatosis viral oncogene homolog 1, lung carcinoma derived (avian)	4	123.002	0.505793	0.000426439	-0.00972971	0.963108	purple	-	yes	-	-
130	ENSMUSG00000046093	Hpcal4	170638	hippocalcin-like 4	4	123.019	0.500434	0.000505591	-2.42882	9.18787e-24	purple	-	yes	-	-
131	ENSMUSG00000028894	Inpp5b	16330	inositol polyphosphate-5-phosphatase B	4	124.801	0.495819	0.000583957	0.163233	0.238063	purple	-	-	-	-
132	ENSMUSG00000028845	Tekt2	24084	tektin 2	4	126.322	0.56379	5.40422e-05	-0.306772	0.179682	purple	-	yes	-	yes
133	ENSMUSG00000042616	Oscp1	230751	organic solute carrier partner 1	4	126.41	0.662927	4.48542e-07	-0.205304	0.388402	purple	-	-	-	-
134	ENSMUSG00000040795	Iqcc	230767	IQ motif containing C	4	129.616	0.340549	0.0248707	-0.657069	0.000467537	purple	-	yes	Nonsense	-
135	ENSMUSG00000012126	Ubxn11	67586	UBX domain protein 11	4	134.57	0.313964	0.0398712	-0.435556	0.0364012	purple	-	yes	-	-
136	ENSMUSG00000028801	Stpg1	78806	sperm tail PG rich repeat containing 1	4	135.939	0.372012	0.0134599	#N/A	#N/A	purple	-	yes	-	-
137	ENSMUSG00000001604	Tcea3	21401	transcription elongation factor A (SII), 3	4	136.275	0.3173	0.0376618	-0.71094	0.00167435	purple	-	-	-	-
138	ENSMUSG00000070661	Rnf186	66825	ring finger protein 186	4	138.968	0.39837	0.00765018	-0.349872	0.174634	purple	-	yes	-	-
139	ENSMUSG00000043621	Ubxn10	212190	UBX domain protein 10	4	139.176	0.4944	0.000610139	-0.454436	0.000345714	purple	-	yes	Nonsynonymous SNP	-
140	ENSMUSG00000051435	Fhad1	329977	forkhead-associated (FHA) phosphopeptide binding domain 1	4	141.933	0.391991	0.00881052	-0.753027	0.0012639	purple	-	-	Nonsynonymous SNP	-
141	ENSMUSG00000028591	Pramef12	77632	PRAME family member 12	4	144.392	0.457226	0.00178982	0.190692	0.749066	purple	-	-	Nonsynonymous SNP	-
142	ENSMUSG00000029026	Trp73	22062	transformation related protein 73	4	154.056	0.385902	0.0100547	-0.600281	0.00181055	purple	-	-	-	yes
143	ENSMUSG00000029049	Morn1	76866	MORN repeat containing 1	4	155.145	0.421609	0.00445763	-0.684401	0.0136992	purple	-	yes	-	-
144	ENSMUSG00000029074	Ttll10	330010	tubulin tyrosine ligase-like family, member 10	4	156.047	0.374153	0.0128794	-0.295826	0.21233	purple	-	-	Nonsynonymous SNP	-
145	ENSMUSG00000061576	Dpp6	13483	dipeptidylpeptidase 6	5	27.4527	0.379247	0.0115818	-1.40615	9.73528e-07	purple	-	-	-	-
146	ENSMUSG00000073102	Ccdc164	381738	dynein regulatory complex subunit 1	5	29.9548	0.577416	3.1106e-05	-0.566103	0.0552936	purple	-	-	-	-
147	ENSMUSG00000011034	Slc5a1	20537	solute carrier family 5 (sodium/glucose cotransporter), member 1	5	33.1627	0.367831	0.0146578	0.382218	0.103718	purple	-	-	-	-
148	ENSMUSG00000050677	Ccdc96	66717	coiled-coil domain containing 96	5	36.4877	0.515047	0.000315405	-0.289334	0.19778	purple	-	-	Nonsynonymous SNP	-
149	ENSMUSG00000029086	Prom1	19126	prominin 1 -verified: bad probe (aligns to an intron)	5	44.0443	0.6679	3.33329e-07	-0.522125	0.00154196	purple	-	-	Nonsynonymous SNP	-
150	ENSMUSG00000029193	Cckar	12425	cholecystokinin A receptor	5	53.6986	0.477642	0.00100796	-0.733472	1.91068e-05	purple	-	-	Nonsynonymous SNP	yes
151	ENSMUSG00000090061	3110047P20Rik	319807	RIKEN cDNA 3110047P20 gene	5	63.4092	0.441191	0.00273552	0.833887	4.8619e-05	purple	-	-	Nonsynonymous SNP	-
152	ENSMUSG00000037890	Wdr19	213081	WD repeat domain 19	5	65.2603	0.540798	0.000129111	0.519639	0.00708761	purple	-	yes	-	-
153	ENSMUSG00000037653	Kctd8	243043	potassium channel tetramerisation domain containing 8	5	69.1099	0.367686	0.014701	-1.18448	5.93443e-06	purple	-	-	-	-
154	ENSMUSG00000029155	Spata18	73472	spermatogenesis associated 18	5	73.6753	0.603407	9.97936e-06	-0.943612	1.86187e-10	purple	-	-	-	-
155	ENSMUSG00000029273	Sult1d1	53315	sulfotransferase family 1D, member 1	5	87.5552	0.534444	0.000162188	-2.19349	1.23841e-28	purple	-	yes	-	-
156	ENSMUSG00000057816	1700007G11Rik	75784	RIKEN cDNA 1700007G11 gene	5	98.8018	0.494994	0.000599059	-0.39096	0.325735	purple	-	-	-	-
157	ENSMUSG00000029330	Cds1	74596	CDP-diacylglycerol synthase 1	5	101.824	0.637398	1.86694e-06	-0.324292	0.0049944	purple	-	yes	-	-
158	ENSMUSG00000029499	Pxmp2	19301	peroxisomal membrane protein 2	5	110.274	0.367131	0.0148669	-0.823258	0.000103058	purple	-	-	-	-
159	ENSMUSG00000029521	Chek2	50883	CHK2 checkpoint homolog (S. pombe)	5	110.872	0.305451	0.0459853	-0.236935	0.337847	purple	yes	-	Nonsynonymous SNP	-
160	ENSMUSG00000043913	Ccdc60	269693	coiled-coil domain containing 60	5	115.937	0.576433	3.24016e-05	-0.574649	0.00766963	purple	-	yes	-	-
161	ENSMUSG00000029601	Iqcd	75732	IQ motif containing D	5	120.607	0.58019	2.77001e-05	-1.58206	6.33704e-08	purple	-	-	-	-
162	ENSMUSG00000029442	Wdr66	269701	WD repeat domain 66	5	123.28	0.57627	3.26218e-05	#N/A	#N/A	purple	-	-	Nonsynonymous SNP	-
163	ENSMUSG00000063409	Lrrc43	381741	leucine rich repeat containing 43	5	123.494	0.471171	0.00121439	-0.798342	0.00479455	purple	-	-	Nonsynonymous SNP	-
164	ENSMUSG00000029431	B3gnt4	231727	UDP-GlcNAc:betaGal beta-1,3-N-acetylglucosaminyltransferase 4	5	123.512	0.397373	0.00782243	-1.44868	3.55196e-06	purple	-	-	Nonsynonymous SNP	-
165	ENSMUSG00000038011	Dnahc10	56087	dynein, axonemal, heavy chain 10	5	124.778	0.487734	0.000747561	-1.18699	1.94247e-11	purple	-	-	Splice site mutation	-
166	ENSMUSG00000029658	Wdr95	381693	WD40 repeat domain 95	5	148.77	0.343395	0.023587	-0.388396	0.306447	purple	-	yes	-	-
167	ENSMUSG00000029660	4930588N13Rik	75860	RIKEN cDNA 4930588N13 gene	5	149.47	0.58864	1.93065e-05	-0.442714	0.194622	purple	-	-	-	-
168	ENSMUSG00000010796	Asz1	74068	ankyrin repeat, SAM and basic leucine zipper domain containing 1	6	18.0511	0.313167	0.0404144	-0.079728	0.956001	purple	-	-	-	-
169	ENSMUSG00000056215	Lrguk	74354	leucine-rich repeats and guanylate kinase domain containing	6	33.8176	0.591694	1.6896e-05	-0.876079	8.35121e-08	purple	-	yes	-	-
170	ENSMUSG00000071506	Tmem139	109218	transmembrane protein 139	6	42.2641	0.338163	0.0259907	-0.458161	0.0402262	purple	-	-	-	-
171	ENSMUSG00000029811	Abp1	76507	amiloride binding protein 1 (amine oxidase, copper-containing)	6	48.909	0.375079	0.0126347	0.414782	0.083536	purple	-	yes	-	-
172	ENSMUSG00000037973	Ccdc129	232016	coiled-coil domain containing 129	6	55.9784	0.668603	3.19467e-07	-2.1024	9.76976e-26	purple	-	yes	-	-
173	ENSMUSG00000039578	Fam190a	232035	family with sequence similarity 190, member A	6	61.3129	0.630511	2.67269e-06	-0.703506	1.30696e-05	purple	-	-	-	-
174	ENSMUSG00000052861	Dnahc6	330355	dynein, axonemal, heavy chain 6	6	73.4705	0.414043	0.0053388	-1.45024	3.48015e-31	purple	-	-	Nonsynonymous SNP	-
175	ENSMUSG00000030017	Reg3g	19695	regenerating islet-derived 3 gamma	6	78.4665	0.526562	0.000213698	1.22782	0.0131905	purple	-	yes	-	-
176	ENSMUSG00000030043	Tacr1	21336	tachykinin receptor 1	6	82.557	0.343716	0.023446	-0.338671	0.33163	purple	-	-	-	yes
177	ENSMUSG00000006269	Atp6v1b1	110935	ATPase, H+ transporting, lysosomal V1 subunit B1	6	83.7585	0.600727	1.1281e-05	-2.60483	1.80963e-22	purple	-	yes	-	-
178	ENSMUSG00000068299	1700019G17Rik	75541	RIKEN cDNA 1700019G17, N-acyltransferase superfamily member similar to CML2	6	85.9008	0.508945	0.000385231	-0.170464	0.684571	purple	-	yes	-	-
179	ENSMUSG00000030321	BC060267	212516	cDNA sequence BC060267	6	115.811	0.440239	0.0028033	-0.827645	5.03967e-05	purple	-	-	-	-
180	ENSMUSG00000030125	Lrrc23	16977	leucine rich repeat containing 23	6	124.77	0.496268	0.000575878	-1.10665	1.18124e-05	purple	-	-	-	-
181	ENSMUSG00000047228	A2ml1	232400	alpha-2-macroglobulin like 1 (ovostatin homolog)	6	128.59	0.32168	0.0349134	#N/A	#N/A	purple	yes	-	-	-
182	ENSMUSG00000008540	Mgst1	56615	microsomal glutathione S-transferase 1	6	138.151	0.470508	0.00123748	-0.334023	0.0627878	purple	-	yes	-	-
183	ENSMUSG00000030279	5730419I09Rik	74741	RIKEN cDNA 5730419I09 gene	6	143.011	0.560972	6.03722e-05	-0.201227	0.173519	purple	-	yes	-	-
184	ENSMUSG00000043541	Casc1	320662	cancer susceptibility candidate 1	6	145.195	0.437435	0.00301155	-1.27493	2.44248e-08	purple	-	-	-	yes
185	ENSMUSG00000019734	Tmc4	353499	transmembrane channel-like gene family 4	7	3.66711	0.358945	0.0175028	0.429392	0.00129654	purple	-	-	Nonsynonymous SNP	-
186	ENSMUSG00000006154	Eps8l1	67425	EPS8-like 1	7	4.47894	0.326761	0.0319306	0.098001	0.742078	purple	-	yes	-	-
187	ENSMUSG00000004961	Syt5	53420	synaptotagmin V	7	4.54009	0.370772	0.0138065	-0.371438	0.0546838	purple	-	-	-	-
188	ENSMUSG00000055826	1700008P20Rik	69301	RIKEN cDNA 1700008P20 gene	7	24.3333	0.304505	0.0467087	1.73771	0.108868	purple	yes	-	-	-
189	ENSMUSG00000060188	Cxcl17			7	24.615	0.317709	0.0373982	0.925937	4.81763e-19	purple	-	-	-	-
190	ENSMUSG00000089661	Mia1	12587	melanoma inhibitory activity 1	7	27.1802	0.316914	0.0379122	-0.262539	0.638383	purple	-	-	-	-
191	ENSMUSG00000047730	Fcgbp	215384	Fc fragment of IgG binding protein	7	28.1003	0.306351	0.0453059	-0.557805	0.176483	purple	-	-	-	-
192	ENSMUSG00000039099	Wdr93	626359	WD repeat domain 93	7	72.5983	0.452082	0.00205582	-1.45487	2.03037e-09	purple	-	yes	-	-
193	ENSMUSG00000045467	Ttll13	269954	tubulin tyrosine ligase-like family, member 13	7	80.2525	0.427932	0.00382054	-0.439206	0.400009	purple	-	-	-	-
194	ENSMUSG00000038570	Fam154b	330577	family with sequence similarity 154, member B	7	82.6464	0.725934	6.06833e-09	-1.07261	7.58106e-10	purple	-	-	Nonsynonymous SNP	-
195	ENSMUSG00000039391	Ccdc81	70884	coiled-coil domain containing 81	7	82.7179	0.662285	4.65858e-07	-1.01245	9.06296e-07	purple	-	-	-	-
196	ENSMUSG00000011154	1700026D08Rik	75556	RIKEN cDNA 1700026D08 gene	7	83.7746	0.619557	4.63233e-06	-1.44512	7.2021e-16	purple	-	-	-	-
197	ENSMUSG00000041343	Ankrd42	73845	ankyrin repeat domain 42	7	92.6091	0.557443	6.92423e-05	-0.625216	0.00509565	purple	-	yes	-	-
198	ENSMUSG00000047248	C2cd3	277939	C2 calcium-dependent domain containing 3	7	100.47	0.347915	0.0216612	-0.165001	0.16382	purple	-	-	Nonsynonymous SNP	yes
199	ENSMUSG00000064307	Lrrc51	69358	leucine rich repeat containing 51	7	101.916	0.301666	0.0489347	-0.170945	0.376152	purple	yes	-	-	-
200	ENSMUSG00000031022	BC051019	57355	cDNA sequence BC051019	7	102.567	0.390625	0.00907763	-0.268468	0.114048	purple	-	-	-	-
201	ENSMUSG00000073856	Iqck	434232	IQ motif containing K	7	111.794	0.557095	7.01778e-05	-0.447225	0.0558805	purple	-	-	Nonsynonymous SNP	-
202	ENSMUSG00000030889	Vwa3a	233813	von Willebrand factor A domain containing 3A	7	113.643	0.412043	0.00559543	-0.752357	1.09989e-05	purple	-	-	-	-
203	ENSMUSG00000030650	Tmc5	74424	transmembrane channel-like gene family 5	7	118.675	0.491842	0.000659969	0.80018	0.00180992	purple	-	-	Splice site mutation	-
204	ENSMUSG00000030954	Gp2	67133	glycoprotein 2 (zymogen granule membrane)	7	119.443	0.382611	0.010787	0.709536	0.00958039	purple	-	yes	Nonsynonymous SNP	-
205	ENSMUSG00000033533	Acsm1	117147	acyl-CoA synthetase medium-chain family member 1	7	119.662	0.637224	1.88421e-06	-0.0367423	0.871479	purple	-	-	Nonsynonymous SNP	-
206	ENSMUSG00000030866	Ern2	26918	endoplasmic reticulum (ER) to nucleus signalling 2 (unfolded protein response, endoplasmic reticulum UPRer component)	7	122.17	0.318258	0.0370461	-0.714087	0.27346	purple	-	yes	-	-
207	ENSMUSG00000057176	Gm166	233899	gene model 166, (NCBI)	7	127.583	0.462498	0.00154901	-0.342926	0.0527612	purple	-	-	-	-
208	ENSMUSG00000030800	Prss8	76560	protease, serine, 8 (prostasin)	7	127.926	0.34161	0.0243854	0.263151	0.222325	purple	-	-	-	-
209	ENSMUSG00000047517	Dmbt1	12945	deleted in malignant brain tumors 1	7	131.121	0.326679	0.0319773	2.72126	5.45468e-23	purple	-	yes	Nonsynonymous SNP	-
210	ENSMUSG00000053111	Fank1	66930	fibronectin type 3 and ankyrin repeat domains 1	7	133.881	0.367829	0.0146586	-0.60639	0.00768924	purple	-	yes	-	-
211	ENSMUSG00000049571	9330101J02Rik	320625	RIKEN cDNA 9330101J02 gene	7	139.64	0.320097	0.035887	#N/A	#N/A	purple	-	-	Nonsynonymous SNP	-
212	ENSMUSG00000066129	Kndc1	76484	kinase non-catalytic C-lobe domain (KIND) containing 1	7	139.927	0.337212	0.0264483	-0.612962	0.000119556	purple	-	-	-	-
213	ENSMUSG00000037974	Muc5ac	17833	mucin 5, subtypes A and C, tracheobronchial/gastric	7	141.811	0.492454	0.000647719	0.658875	0.0406172	purple	-	yes	-	-
214	ENSMUSG00000066108	Muc5b	74180	mucin 5, subtype B, tracheobronchial	7	141.873	0.405386	0.0065273	0.536766	0.0113286	purple	-	yes	-	yes
215	ENSMUSG00000037738	Nek5	330721	NIMA (never in mitosis gene a)-related expressed kinase 5	8	21.9636	0.630696	2.64752e-06	-0.645326	0.000558733	purple	-	-	-	-
216	ENSMUSG00000006567	Atp7b	11979	ATPase, Cu++ transporting, beta polypeptide	8	22.0001	0.345201	0.0228014	-0.815954	2.31242e-08	purple	-	-	-	-
217	ENSMUSG00000039720	Got1l1	76615	glutamic-oxaloacetic transaminase 1-like 1	8	27.1976	0.317714	0.0373951	-1.34365	0.122109	purple	yes	-	-	-
218	ENSMUSG00000031584	Gsr	14782	glutathione reductase 1	8	33.6978	0.421584	0.00446032	0.616534	6.39438e-05	purple	yes	-	Nonsynonymous SNP	-
219	ENSMUSG00000045636	Mtus1	102103	mitochondrial tumor suppressor 1	8	41.02	0.535964	0.000153649	-0.541358	1.09701e-06	purple	yes	-	Nonsynonymous SNP	-
220	ENSMUSG00000071103	1700029J07Rik	69479	RIKEN cDNA 1700029J07 gene	8	45.9537	0.359444	0.0173315	-1.08961	6.44871e-07	purple	-	-	-	-
221	ENSMUSG00000048148	Nwd1	319555	NACHT and WD repeat domain containing 1	8	72.4744	0.533438	0.000168075	-0.0803696	0.756148	purple	-	yes	Nonsynonymous SNP	-
222	ENSMUSG00000037101	Ttc29	73301	tetratricopeptide repeat domain 29	8	78.2208	0.678689	1.71004e-07	-1.05786	1.07609e-08	purple	-	-	-	-
223	ENSMUSG00000036872	Abcc12	244562	ATP-binding cassette, sub-family C (CFTR/MRP), member 12	8	86.5342	0.32951	0.0304062	-1.18114	0.13452	purple	-	-	-	-
224	ENSMUSG00000031786	Ccdc135	330830	coiled-coil domain containing 135	8	95.0591	0.615375	5.67811e-06	-0.25454	0.139852	purple	-	-	-	-
225	ENSMUSG00000036598	Ccdc113	244608	coiled-coil domain containing 113	8	95.5588	0.774735	6.83171e-11	-0.514566	0.0944747	purple	-	-	-	-
226	ENSMUSG00000031886	Ces2e	234673	carboxylesterase 2E	8	102.402	0.361466	0.0166523	-1.74745	1.12111e-07	purple	-	yes	-	-
227	ENSMUSG00000031877	Ces2g	72361	carboxylesterase 2G	8	102.438	0.353329	0.0195282	-0.986569	4.42976e-08	purple	-	yes	-	-
228	ENSMUSG00000054320	Lrrc36	270091	leucine rich repeat containing 36	8	105.464	0.333507	0.0282958	-1.00575	1.68664e-12	purple	-	-	-	-
229	ENSMUSG00000031893	Tsnaxip1	72236	translin-associated factor X (Tsnax) interacting protein 1	8	105.837	0.612034	6.66411e-06	-0.792753	0.000678998	purple	-	-	-	-
230	ENSMUSG00000031951	Tmem231	234740	transmembrane protein 231	8	109.388	0.411759	0.00563271	-0.504035	0.0030133	purple	-	yes	-	-
231	ENSMUSG00000059854	Hydin	244653	hydrocephalus inducing	8	110.61	0.528074	0.000202813	-1.2986	8.51062e-16	purple	-	-	-	yes
232	ENSMUSG00000034467	Dynlrb2	75465	dynein light chain roadblock-type 2	8	116.516	0.633523	2.28748e-06	-1.07481	4.09325e-14	purple	-	-	-	-
233	ENSMUSG00000031847	1700030J22Rik	69528	RIKEN cDNA 1700030J22 gene	8	116.97	0.401433	0.0071412	-0.488229	0.0525271	purple	-	-	-	-
234	ENSMUSG00000031831	Dnaaf1	68270	dynein axonemal assembly factor 1	8	117.051	0.643982	1.3118e-06	#N/A	#N/A	purple	-	yes	-	-
235	ENSMUSG00000034112	Atp2c2	69047	ATPase, Ca++ transporting, type 2C, member 2	8	119.758	0.384078	0.0104552	-0.314599	0.193112	purple	-	-	-	-
236	ENSMUSG00000040729	AK129341	234915	cDNA sequence AK129341	9	8.07804	0.705929	2.70671e-08	-0.597555	0.000152347	purple	-	-	-	-
237	ENSMUSG00000037419	Endod1	71946	endonuclease domain containing 1	9	14.354	0.385491	0.0101438	0.0927612	0.452199	purple	-	yes	-	-
238	ENSMUSG00000031927	1700012B09Rik	69325	RIKEN cDNA 1700012B09 gene	9	14.7566	0.592948	1.59885e-05	-0.106107	0.874247	purple	-	-	-	-
239	ENSMUSG00000039977	Ccdc67	234964	coiled-coil domain containing 67	9	15.5612	0.339354	0.0254265	-0.898336	0.00392135	purple	-	-	-	-
240	ENSMUSG00000039632	Ccdc151	77609	coiled-coil domain containing 151	9	22.1854	0.580409	2.74467e-05	-0.470792	0.098466	purple	-	-	-	yes
241	ENSMUSG00000036411	9530077C05Rik	68283	RIKEN cDNA 9530077C05 gene	9	22.4445	0.44951	0.00220138	-0.218797	0.507404	purple	-	-	-	-
242	ENSMUSG00000035919	Bbs9	319845	Bardet-Biedl syndrome 9	9	22.8881	0.353743	0.0193723	-0.389541	0.0193011	purple	-	-	-	-
243	ENSMUSG00000085576	Dpy19l2	320752	dpy-19-like 2 (C. elegans)	9	24.5576	0.612545	6.50372e-06	-1.81098	0.0021311	purple	-	-	-	yes
244	ENSMUSG00000001948	Spa17	20686	sperm autoantigenic protein 17	9	37.6033	0.31808	0.0371599	-1.4175	2.40949e-13	purple	-	-	-	-
245	ENSMUSG00000032023	Jhy	70989	junctional cadherin complex regulator	9	40.8955	0.42364	0.00424364	#N/A	#N/A	purple	-	-	-	-
246	ENSMUSG00000037287	Tbcel	272589	tubulin folding cofactor E-like	9	42.4124	0.491404	0.000668844	-0.705304	7.60681e-12	purple	-	-	-	-
247	ENSMUSG00000070306	Ccdc153	270150	coiled-coil domain containing 153	9	44.4326	0.484901	0.000813845	-0.967529	1.58003e-06	purple	-	-	-	-
248	ENSMUSG00000032094	Cd3d	12500	CD3 antigen, delta polypeptide	9	44.9863	0.326733	0.0319468	1.01097	0.0087159	purple	-	-	-	-
249	ENSMUSG00000040219	Ttc12	235330	tetratricopeptide repeat domain 12	9	49.0612	0.539764	0.000134043	-0.695586	3.53069e-05	purple	-	-	Nonsynonymous SNP	-
250	ENSMUSG00000000167	Pih1d2	72614	PIH1 domain containing 2	9	50.6075	0.67942	1.63249e-07	-0.940102	0.000237932	purple	-	-	-	-
251	ENSMUSG00000032062	2310030G06Rik	66952	RIKEN cDNA 2310030G06 gene	9	50.7399	0.44954	0.00219959	0.494743	0.0131999	purple	-	-	-	-
252	ENSMUSG00000037971	1110032A03Rik	68721	RIKEN cDNA 1110032A03 gene	9	50.763	0.306994	0.0448247	-0.439214	0.0153196	purple	-	-	-	-
253	ENSMUSG00000032057	4833427G06Rik	235345	RIKEN cDNA 4833427G06 gene	9	51.0813	0.599553	1.18987e-05	-0.366801	0.28502	purple	-	-	-	-
254	ENSMUSG00000041986	Elmod1	270162	ELMO/CED-12 domain containing 1 (striatum expressed)	9	53.9196	0.594593	1.48646e-05	-0.70208	0.000171533	purple	-	-	-	-
255	ENSMUSG00000032224	Fam81a	76886	family with sequence similarity 81, member A	9	70.2772	0.705189	2.8551e-08	-1.36835	4.58694e-11	purple	-	-	-	-
256	ENSMUSG00000032202	Rab27a	11891	RAB27A, member RAS oncogene family	9	73.0974	0.341325	0.0245151	-0.236515	0.197318	purple	yes	-	-	-
257	ENSMUSG00000086158	Gm5918	546143	predicted gene 5918	9	73.1356	0.332725	0.0286988	-0.661146	0.0025971	purple	-	-	-	-
258	ENSMUSG00000032258	Lca5	75782	Leber congenital amaurosis 5 (human) -verified: bad probe (low expression level)	9	83.3915	0.388548	0.00949683	-0.519415	0.00361223	purple	-	-	-	-
259	ENSMUSG00000043587	Acpl2	235534	acid phosphatase-like 2	9	96.8609	0.453614	0.0019732	-0.926293	1.24536e-11	purple	-	-	-	-
260	ENSMUSG00000032549	Rab6b	270192	RAB6B, member RAS oncogene family	9	103.185	0.430103	0.00362076	-1.05203	1.04348e-13	purple	-	yes	-	-
261	ENSMUSG00000032561	Acpp	56318	acid phosphatase, prostate	9	104.158	0.445188	0.00246624	0.22045	0.380212	purple	-	-	Nonsynonymous SNP	-
262	ENSMUSG00000035032	Nek11	208583	NIMA (never in mitosis gene a)-related expressed kinase 11	9	104.208	0.568452	4.48797e-05	-1.10437	1.38185e-05	purple	-	-	Nonsynonymous SNP	-
263	ENSMUSG00000032786	Alas1	11655	aminolevulinic acid synthase 1	9	106.234	0.546376	0.000105225	-0.221474	0.0270979	purple	-	-	-	-
264	ENSMUSG00000010044	Zmynd10	114602	zinc finger, MYND domain containing 10	9	107.551	0.45969	0.00167348	-0.577807	0.0131499	purple	-	-	-	-
265	ENSMUSG00000032595	Cdhr4	69398	cadherin-related family member 4	9	108.095	0.357799	0.0179013	#N/A	#N/A	purple	-	-	Nonsynonymous SNP	-
266	ENSMUSG00000032489	Kif9	16578	kinesin family member 9	9	110.524	0.599422	1.19695e-05	-0.0982554	0.536249	purple	-	-	-	-
267	ENSMUSG00000049555	Tmie	20776	transmembrane inner ear	9	110.866	0.303334	0.0476171	-0.644537	0.0221477	purple	-	-	-	-
268	ENSMUSG00000032496	Ltf	17002	lactotransferrin	9	111.042	0.555511	7.45826e-05	0.37084	0.184884	purple	-	-	Nonsynonymous SNP	-
269	ENSMUSG00000038060	Dlec1	320256	deleted in lung and esophageal cancer 1	9	119.124	0.435551	0.00315883	-1.11411	4.06082e-08	purple	-	-	-	-
270	ENSMUSG00000032514	Ttc21a	74052	tetratricopeptide repeat domain 21A	9	119.968	0.504837	0.000439691	-0.721157	0.000254147	purple	-	-	Nonsynonymous SNP	-
271	ENSMUSG00000040936	Ulk4	209012	unc-51-like kinase 4 (C. elegans)	9	120.96	0.552723	8.29437e-05	-0.872615	3.43108e-07	purple	-	-	Nonsynonymous SNP	yes
272	ENSMUSG00000037949	Ano10	102566	anoctamin 10	9	122.267	0.303949	0.0471384	0.0845045	0.590249	purple	-	-	-	-
273	ENSMUSG00000035498	Cdcp1	109332	CUB domain containing protein 1	9	123.176	0.308593	0.043647	0.143289	0.343119	purple	-	-	-	-
274	ENSMUSG00000019767	Ccdc170	100504234	coiled-coil domain containing 170	10	5.80484	0.540991	0.00012821	#N/A	#N/A	purple	-	-	-	-
275	ENSMUSG00000071392	Ect2l	100045792	epithelial cell transforming sequence 2 oncogene-like	10	18.4092	0.529942	0.000190043	-1.33046	5.26623e-09	purple	-	-	Nonsynonymous SNP	-
276	ENSMUSG00000019982	Myb	17863	v-myb myeloblastosis viral oncogene	10	21.1474	0.588937	1.90595e-05	-0.217788	0.447252	purple	-	-	-	-
277	ENSMUSG00000037490	Slc2a12	353169	solute carrier family 2 (facilitated glucose transporter), member 12	10	22.7037	0.555277	7.52521e-05	-0.351979	0.0951955	purple	-	-	-	-
278	ENSMUSG00000039552	Rsph4a	212892	radial spoke head protein 4 homolog A	10	33.9158	0.733095	3.38223e-09	-1.3146	1.99574e-21	purple	-	-	-	-
279	ENSMUSG00000038522	AI317395	215929	expressed sequence AI317395	10	40.002	0.563379	5.49262e-05	-0.752662	0.0234881	purple	-	yes	-	-
280	ENSMUSG00000078451	Ppil6	73075	peptidylprolyl isomerase (cyclophilin)-like 6	10	41.5075	0.493792	0.000621661	-1.11822	1.21984e-05	purple	-	yes	-	-
281	ENSMUSG00000075225	Ccdc162	75973	coiled-coil domain containing 162	10	41.8309	0.486417	0.00077775	-1.25351	5.2826e-11	purple	-	-	-	-
282	ENSMUSG00000003227	Edar	13608	ectodysplasin-A receptor	10	58.6011	0.355629	0.0186763	0.320677	0.295562	purple	-	-	-	-
283	ENSMUSG00000020072	Pbld1	68371	phenazine biosynthesis-like protein domain containing 1	10	63.5989	0.327143	0.0317153	-1.2644	0.00219921	purple	-	-	-	-
284	ENSMUSG00000035504	Reep6	70335	receptor accessory protein 6	10	80.3347	0.342418	0.0240215	-0.0836278	0.809152	purple	-	-	-	-
285	ENSMUSG00000020062	Slc5a8	216225	solute carrier family 5 (iodide transporter), member 8	10	88.9281	0.382683	0.0107706	-1.27102	4.52843e-05	purple	-	-	Nonsynonymous SNP	-
286	ENSMUSG00000054934	Kcnmb4	58802	potassium large conductance calcium-activated channel, subfamily M, beta member 4	10	116.418	0.402875	0.00691177	-1.15038	0.0021311	purple	-	yes	-	-
287	ENSMUSG00000020212	Mdm1	17245	transformed mouse 3T3 cell double minute 1	10	118.169	0.301528	0.0490453	-0.808891	1.21254e-10	purple	-	yes	Nonsynonymous SNP	-
288	ENSMUSG00000034813	Grip1	74053	glutamate receptor interacting protein 1	10	120.011	0.359471	0.0173225	-0.38564	0.151807	purple	-	-	Nonsynonymous SNP	-
289	ENSMUSG00000047205	Dusp18	75219	dual specificity phosphatase 18	11	3.90113	0.459967	0.00166083	-0.379104	0.00379042	purple	-	-	-	-
290	ENSMUSG00000019368	Sec14l4	103655	SEC14-like 4 (S. cerevisiae)	11	4.04725	0.4452	0.00246542	-0.77837	0.000131381	purple	-	-	-	-
291	ENSMUSG00000020412	Ascc2	75452	activating signal cointegrator 1 complex subunit 2	11	4.68331	0.579117	2.89751e-05	-0.0474789	0.83119	purple	-	-	-	-
292	ENSMUSG00000020396	Nefh	380684	neurofilament, heavy polypeptide	11	4.93904	0.398388	0.00764715	0.506012	0.422162	purple	-	-	-	-
293	ENSMUSG00000040978	Gm11992	626870	predicted gene 11992	11	9.14859	0.590572	1.77482e-05	-0.457446	0.0137007	purple	-	yes	-	-
294	ENSMUSG00000020142	Slc1a4	55963	solute carrier family 1 (glutamate/neutral amino acid transporter), member 4	11	20.3023	0.47993	0.00094278	-0.153901	0.322338	purple	-	-	-	-
295	ENSMUSG00000020319	Wdpcp	216560	WD repeat containing planar cell polarity effector	11	21.9134	0.61129	6.90412e-06	-0.685871	2.35966e-06	purple	-	-	Nonsynonymous SNP	yes
296	ENSMUSG00000049811	Fam161a	73873	family with sequence similarity 161, member A	11	23.1206	0.669754	2.97906e-07	-1.27703	1.69705e-09	purple	-	-	-	yes
297	ENSMUSG00000020159	Gabrp	216643	gamma-aminobutyric acid (GABA-A) receptor, pi	11	33.5543	0.784461	2.36755e-11	-0.322835	0.0412081	purple	-	-	-	-
298	ENSMUSG00000064057	Scgb3a1	68662	secretoglobin, family 3A, member 1	11	49.664	0.418776	0.00477163	-0.675546	0.00675044	purple	-	yes	-	-
299	ENSMUSG00000049154	Fam183b	75429	family with sequence similarity 183, member B	11	58.9793	0.715354	1.38407e-08	-0.460182	0.0276567	purple	yes	-	-	-
300	ENSMUSG00000056598	Lrrc48	74665	leucine rich repeat containing 48	11	60.3751	0.607113	8.40432e-06	-0.790165	1.61663e-05	purple	-	-	-	-
301	ENSMUSG00000001039	B9d1	27078	B9 protein domain 1	11	61.5128	0.372922	0.0132106	1.0908	0.0100026	purple	-	-	-	yes
302	ENSMUSG00000056752	Dnahc9	237806	dynein, axonemal, heavy chain 9	11	65.8316	0.58707	2.06646e-05	-1.1947	5.38944e-16	purple	-	-	Nonsynonymous SNP	-
303	ENSMUSG00000050270	Tmem220	338369	transmembrane protein 220	11	67.2117	0.418809	0.00476792	-0.836249	1.87301e-05	purple	-	-	-	-
304	ENSMUSG00000020904	Wdr16	71860	WD repeat domain 16	11	67.9251	0.579169	2.89125e-05	-0.245177	0.305686	purple	-	-	-	-
305	ENSMUSG00000005237	Dnahc2	327954	dynein, axonemal, heavy chain 2	11	69.5107	0.315777	0.0386581	-1.19251	2.20868e-10	purple	-	-	Nonsynonymous SNP	-
306	ENSMUSG00000020884	Asgr1	11889	asialoglycoprotein receptor 1	11	70.0575	0.376448	0.0122803	-2.71716	2.41826e-12	purple	-	-	-	-
307	ENSMUSG00000020799	Tekt1	21689	tektin 1	11	72.3456	0.557019	7.03822e-05	-0.443608	0.141375	purple	-	yes	-	-
308	ENSMUSG00000005947	Itgae	16407	integrin, alpha E, epithelial-associated	11	73.1474	0.331669	0.0292508	-0.841504	1.09321e-05	purple	-	yes	Nonsynonymous SNP	-
309	ENSMUSG00000018648	Dusp14	56405	dual specificity phosphatase 14	11	84.0485	0.425781	0.00402778	0.0143537	0.956252	purple	-	-	Nonsynonymous SNP	-
310	ENSMUSG00000047773	Ankfn1	382543	ankyrin-repeat and fibronectin type III domain containing 1	11	89.4228	0.60354	9.9185e-06	-0.88069	0.00231243	purple	-	-	Nonsynonymous SNP	-
311	ENSMUSG00000039110	Mycbpap	104601	Mycbp associated protein	11	94.5014	0.596213	1.38292e-05	-1.12911	6.18328e-10	purple	-	-	-	-
312	ENSMUSG00000006056	Calcoco2	76815	calcium binding and coiled-coil domain 2	11	96.0999	0.331872	0.0291441	-1.03541	0.0524482	purple	-	-	-	-
313	ENSMUSG00000038756	Ttll6	237930	tubulin tyrosine ligase-like family, member 6	11	96.1652	0.471049	0.00121861	-0.993902	4.53826e-09	purple	-	-	-	-
314	ENSMUSG00000020878	Lrrc46	69297	leucine rich repeat containing 46	11	97.0348	0.522439	0.000246111	-0.633259	0.00233236	purple	-	yes	-	-
315	ENSMUSG00000035831	Krt25	70810	keratin 25	11	99.316	0.337372	0.0263709	0.733753	NA	purple	-	-	-	-
316	ENSMUSG00000006784	Ttc25	74407	tetratricopeptide repeat domain 25	11	100.572	0.551472	8.69642e-05	-0.793085	0.00599771	purple	-	-	-	-
317	ENSMUSG00000034706	Dnaic2	432611	dynein, axonemal, intermediate chain 2	11	114.754	0.431547	0.00349294	-0.56682	8.7068e-05	purple	-	-	-	-
318	ENSMUSG00000039963	Ccdc40	207607	coiled-coil domain containing 40	11	119.264	0.581769	2.59167e-05	-0.660767	0.00105755	purple	-	-	Nonsynonymous SNP	yes
319	ENSMUSG00000071454	Dtnb	13528	dystrobrevin, beta	12	3.72101	0.309329	0.0431129	-0.250289	0.100192	purple	-	-	-	-
320	ENSMUSG00000020607	Fam84a	105005	family with sequence similarity 84, member A	12	14.1408	0.386379	0.00995224	-0.145123	0.436899	purple	-	yes	-	-
321	ENSMUSG00000071398	2410004P03Rik	73667	RIKEN cDNA 2410004P03 gene	12	17.0054	0.406893	0.00630535	-0.178897	0.233914	purple	-	-	-	-
322	ENSMUSG00000073197	5730507C01Rik	236366	RIKEN cDNA 5730507C01 gene (gene poor CNV segmental duplication region)	12	18.5345	0.448233	0.00227691	-1.56314	0.0526354	purple	yes	-	-	-
323	ENSMUSG00000063632	Sox11	20666	SRY-box 11	12	27.3375	0.434825	0.00321729	-1.19186	1.95073e-12	purple	yes	-	Nonsynonymous SNP	yes
324	ENSMUSG00000020669	Sh3yl1	24057	Sh3 domain YSC-like 1	12	30.96	0.470273	0.00124578	-0.25048	0.182847	purple	-	-	-	-
325	ENSMUSG00000035860	Cdhr3	68764	cadherin-related family member 3	12	32.3489	0.732992	3.4113e-09	-1.18184	4.06012e-15	purple	-	-	-	-
326	ENSMUSG00000020581	Agr2	23795	anterior gradient 2 (Xenopus laevis)	12	36.004	0.446931	0.00235626	1.68713	0.00908863	purple	-	-	-	-
327	ENSMUSG00000020990	Cdkl1	71091	cyclin-dependent kinase-like 1 (CDC2-related kinase)	12	69.747	0.462153	0.00156384	-1.46499	9.66422e-07	purple	-	-	-	-
328	ENSMUSG00000051367	Six1	20471	sine oculis-related homeobox 1 homolog (Drosophila)	12	73.0422	0.410359	0.00581956	-0.279816	0.251404	purple	-	-	-	yes
329	ENSMUSG00000034460	Six4	20474	sine oculis-related homeobox 4 homolog (Drosophila)	12	73.1001	0.459256	0.00169348	-1.34326	8.57334e-18	purple	-	-	-	-
330	ENSMUSG00000052221	Ppp1r36	210762	protein phosphatase 1, regulatory subunit 36	12	75.3166	0.539483	0.000135412	-1.16859	2.39592e-09	purple	-	-	-	-
331	ENSMUSG00000059970	Hspa2	15512	heat shock protein 2	12	76.4068	0.328575	0.0309177	0.4293	0.0995148	purple	-	-	-	-
332	ENSMUSG00000057265	Ccdc176	72873	coiled-coil domain containing 176	12	83.319	0.500006	0.000512442	#N/A	#N/A	purple	-	-	-	-
333	ENSMUSG00000021033	Gstz1	14874	glutathione transferase zeta 1 (maleylacetoacetate isomerase)	12	87.1643	0.321948	0.0347504	-0.589691	3.64721e-09	purple	-	-	-	-
334	ENSMUSG00000031027	Stk33	117229	serine/threonine kinase 33	12	101.55	0.402997	0.00689254	-1.24114	2.82298e-11	purple	-	-	-	-
335	ENSMUSG00000021198	Unc79	217843	unc-79 homolog (C. elegans)	12	101.896	0.5996	1.18737e-05	-1.91279	5.99461e-19	purple	-	-	-	-
336	ENSMUSG00000041323	Ak7	78801	adenylate kinase 7	12	105.702	0.726125	5.9759e-09	-1.17211	4.75236e-09	purple	-	-	-	yes
337	ENSMUSG00000021211	Akr1c12	622402	aldo-keto reductase family 1, member C12	13	4.27632	0.393648	0.00849575	-0.312629	0.652137	purple	-	-	-	-
338	ENSMUSG00000021319	Sfrp4	20379	secreted frizzled-related protein 4	13	19.6326	0.38276	0.010753	-1.04579	0.000346083	purple	-	yes	-	-
339	ENSMUSG00000006711	D130043K22Rik	210108	RIKEN cDNA D130043K22 gene	13	24.8012	0.517447	0.000291205	-0.658418	0.00666118	purple	-	yes	-	-
340	ENSMUSG00000035910	Dcdc2a	195208	doublecortin domain containing 2a	13	25.0583	0.697312	4.97841e-08	-2.39096	7.60367e-28	purple	-	-	-	-
341	ENSMUSG00000021363	Mak	17152	male germ cell-associated kinase	13	41.0265	0.504114	0.000449958	-0.0276563	0.888722	purple	-	-	-	-
342	ENSMUSG00000063529	Gm1574	380842	gene model 1574, (NCBI)	13	46.2994	0.651296	8.75965e-07	-1.44642	1.14295e-08	purple	-	yes	-	-
343	ENSMUSG00000021448	Shc3	20418	src homology 2 domain-containing transforming protein C3	13	51.4311	0.357465	0.0180187	-2.42195	0.0764753	purple	-	-	-	-
344	ENSMUSG00000047842	Diras2	68203	DIRAS family, GTP-binding RAS-like 2	13	52.5044	0.504456	0.000445071	-0.781416	9.38967e-07	purple	-	-	-	-
345	ENSMUSG00000060176	Kif27	75050	kinesin family member 27	13	58.2878	0.523244	0.000239461	-0.709977	0.00305482	purple	-	-	-	yes
346	ENSMUSG00000021553	Slc28a3	114304	solute carrier family 28 (sodium-coupled nucleoside transporter), member 3	13	58.5882	0.401687	0.00710028	0.25473	0.384364	purple	-	yes	-	-
347	ENSMUSG00000021534	1700001L19Rik	69315	RIKEN cDNA 1700001L19 gene	13	68.6129	0.668897	3.13819e-07	-0.747874	0.001885	purple	-	yes	-	-
348	ENSMUSG00000074651	Mcin	622408	multiciliate differentiation and DNA synthesis associated cell cycle protein	13	112.204	0.353922	0.0193055	#N/A	#N/A	purple	-	-	-	-
349	ENSMUSG00000078926	Cdc20b	238896	cell division cycle 20 homolog B (S. cerevisiae)	13	113.48	0.402824	0.00691969	#N/A	#N/A	purple	-	-	-	-
350	ENSMUSG00000021751	Acox2	93732	acyl-Coenzyme A oxidase 2, branched chain	14	8.22564	0.613009	6.36132e-06	-0.660366	0.000480723	purple	-	yes	-	-
351	ENSMUSG00000021749	Oit1	18300	oncoprotein induced transcript 1	14	8.34922	0.435252	0.00318281	0.292414	0.366702	purple	-	-	-	-
352	ENSMUSG00000044772	Sntn	218739	sentan, cilia apical structure protein	14	12.8384	0.536751	0.000149392	-0.776654	6.22911e-05	purple	-	-	-	-
353	ENSMUSG00000042567	Nek10	238944	NIMA (never in mitosis gene a)- related kinase 10	14	15.001	0.575736	3.33504e-05	-0.818415	0.00358912	purple	-	-	Nonsynonymous SNP	-
354	ENSMUSG00000039543	Ttc18	76670	tetratricopeptide repeat domain 18	14	20.3943	0.7398	1.91674e-09	-1.03798	5.3797e-12	purple	-	-	Nonsynonymous SNP	-
355	ENSMUSG00000019027	Dnahc1	110084	dynein, axonemal, heavy chain 1	14	31.2868	0.491885	0.000659107	-1.13893	1.34414e-10	purple	-	-	-	-
356	ENSMUSG00000072473	1700024G13Rik	67085	RIKEN cDNA 1700024G13 gene	14	32.3764	0.617346	5.16083e-06	-1.29804	0.000678876	purple	-	-	-	-
357	ENSMUSG00000021790	Dydc1	69496	DPY30 domain containing 1	14	41.0921	0.406939	0.0062988	-1.38927	0.00676236	purple	-	-	-	-
358	ENSMUSG00000022179	4931414P19Rik	74359	RIKEN cDNA 4931414P19 gene	14	54.5843	0.313745	0.0400199	-0.0563661	0.876578	purple	-	-	-	-
359	ENSMUSG00000040055	Gjb6	14623	gap junction membrane channel protein beta 6	14	57.1233	0.34706	0.0220151	-0.38914	0.0228725	purple	-	-	-	-
360	ENSMUSG00000034532	Fbxo16	50759	F-box protein 16	14	65.3031	0.609919	7.36708e-06	-0.0997596	0.780197	purple	-	-	-	-
361	ENSMUSG00000014725	Adam28	13522	a disintegrin and metallopeptidase domain 28	14	68.654	0.614951	5.79534e-06	-0.475779	0.00614529	purple	-	-	Nonsynonymous SNP	-
362	ENSMUSG00000045655	AU021034	219170	expressed sequence AU021034	14	78.0813	0.718282	1.10663e-08	-0.636635	7.634e-05	purple	-	-	-	-
363	ENSMUSG00000042156	Dzip1	66573	DAZ interacting protein 1	14	118.923	0.370818	0.0137934	-0.844973	4.34094e-10	purple	-	-	-	-
364	ENSMUSG00000039676	Capsl	75568	calcyphosine-like	15	9.4658	0.60662	8.59983e-06	-0.315318	0.143102	purple	-	-	-	-
365	ENSMUSG00000022262	Dnahc5	110082	dynein, axonemal, heavy chain 5	15	28.4718	0.633528	2.28694e-06	-1.81313	1.2681e-31	purple	-	-	Nonsynonymous SNP	-
366	ENSMUSG00000044726	BC030476	239368	cDNA sequence BC030476	15	34.4733	0.316754	0.0380165	-1.80415	0.00264541	purple	-	-	-	-
367	ENSMUSG00000048230	Fbxo43	78803	F-box protein 43	15	36.1507	0.336727	0.0266845	-0.934494	0.152816	purple	-	-	-	-
368	ENSMUSG00000037627	Rgs22	626596	regulator of G-protein signalling 22	15	36.2095	0.559723	6.3387e-05	-1.52598	1.20797e-16	purple	-	-	-	-
369	ENSMUSG00000022286	Grhl2	252973	grainyhead-like 2 (Drosophila)	15	37.3335	0.739412	1.98194e-09	-0.43605	0.000536032	purple	-	-	-	yes
370	ENSMUSG00000037106	Fer1l6	631797	fer-1-like 6	15	58.6608	0.404371	0.00668046	#N/A	#N/A	purple	-	yes	-	-
371	ENSMUSG00000022351	Sqle	20775	squalene epoxidase	15	59.3298	0.313095	0.0404634	-0.261154	0.232023	purple	-	-	-	-
372	ENSMUSG00000072568	Fam84b	399603	family with sequence similarity 84, member B	15	60.9874	0.642858	1.39423e-06	-0.501244	0.00280317	purple	-	-	-	-
373	ENSMUSG00000022375	Lrrc6	54562	leucine rich repeat containing 6 (testis)	15	66.3803	0.543235	0.000118134	-1.04758	0.000206611	purple	-	yes	-	-
374	ENSMUSG00000022595	Lypd2	68311	Ly6/Plaur domain containing 2	15	74.7323	0.306321	0.0453283	0.100686	0.826239	purple	-	-	-	-
375	ENSMUSG00000022580	Rhpn1	14787	rhophilin, Rho GTPase binding protein 1	15	75.7135	0.419284	0.00471394	0.355583	0.388904	purple	-	-	Nonsynonymous SNP	-
376	ENSMUSG00000044986	Tst	22117	thiosulfate sulfurtransferase, mitochondrial	15	78.4034	0.336504	0.0267938	-0.288649	0.0639511	purple	-	-	-	-
377	ENSMUSG00000033029	1700088E04Rik	27660	RIKEN cDNA 1700088E04 gene	15	79.1348	0.376736	0.012207	0.0665965	0.829687	purple	-	-	-	-
378	ENSMUSG00000042428	Mgat3	17309	mannoside acetylglucosaminyltransferase 3	15	80.2152	0.655645	6.84756e-07	-0.927526	1.65655e-07	purple	-	-	Nonsynonymous SNP	-
379	ENSMUSG00000022441	Efcab6	77627	EF-hand calcium binding domain 6	15	83.867	0.435065	0.00319788	-1.01278	1.15551e-06	purple	-	-	Nonsynonymous SNP	-
380	ENSMUSG00000022431	Ribc2	67747	RIB43A domain with coiled-coils 2	15	85.1443	0.488475	0.000731042	-0.667322	0.246713	purple	-	-	-	-
381	ENSMUSG00000022383	Ppara	19013	peroxisome proliferator activated receptor alpha	15	85.8026	0.527222	0.000208887	-0.813452	1.78139e-05	purple	-	-	-	-
382	ENSMUSG00000016028	Celsr1	12614	cadherin EGF LAG seven-pass G-type receptor 1	15	85.8991	0.478219	0.000991158	-0.363338	0.0350544	purple	-	-	Nonsynonymous SNP	yes
383	ENSMUSG00000022615	Tymp	72962	thymidine phosphorylase	15	89.5415	0.328546	0.0309341	-0.354275	0.235683	purple	-	yes	-	-
384	ENSMUSG00000022621	Rabl2	68708	RAB, member of RAS oncogene family-like 2	15	89.7575	0.370649	0.0138412	-0.0332058	0.877325	purple	-	-	Nonsynonymous SNP	yes
385	ENSMUSG00000063260	Syt10	54526	synaptotagmin X	15	89.7824	0.525556	0.000221236	-0.790779	0.0461318	purple	-	-	Nonsynonymous SNP	-
386	ENSMUSG00000022629	Kif21a	16564	kinesin family member 21A	15	90.9345	0.742781	1.47893e-09	-0.807406	8.69135e-09	purple	-	-	-	-
387	ENSMUSG00000022449	Adamts20	223838	a disintegrin-like and metallopeptidase (reprolysin type) with thrombospondin type 1 motif, 20	15	94.2703	0.352945	0.0196732	-1.55393	2.23106e-09	purple	-	-	Nonsynonymous SNP	-
388	ENSMUSG00000003354	Ccdc65	105833	coiled-coil domain containing 65	15	98.7091	0.542839	0.000119859	-0.510377	0.0232713	purple	-	-	-	-
389	ENSMUSG00000023032	Slc4a8	59033	solute carrier family 4 (anion exchanger), member 8	15	100.816	0.315682	0.0387209	-0.413162	0.00859499	purple	-	-	-	-
390	ENSMUSG00000022518	4930562C15Rik	78809	RIKEN cDNA 4930562C15 gene	16	4.85201	0.492689	0.000643087	-0.699006	3.10371e-05	purple	-	-	-	-
391	ENSMUSG00000096215	Gm5480	432995	predicted gene 5480	16	5.00767	0.313558	0.0401469	0.550758	0.00321578	purple	-	yes	-	-
392	ENSMUSG00000022783	Spag6	50525	sperm associated antigen 6	16	16.7535	0.702844	3.37645e-08	-0.870883	5.81519e-09	purple	-	-	-	-
393	ENSMUSG00000022759	4930451C15Rik	74685	RIKEN cDNA 4930451C15 gene	16	17.5489	0.631613	2.52536e-06	-2.35036	5.60457e-30	purple	-	-	-	-
394	ENSMUSG00000022758	P2rx6	18440	purinergic receptor P2X, ligand-gated ion channel, 6	16	17.5618	0.488051	0.000740459	-1.54523	1.23509e-11	purple	-	-	-	-
395	ENSMUSG00000003526	Prodh	19125	proline dehydrogenase	16	18.0717	0.312406	0.0409382	-0.295378	0.176304	purple	-	-	-	-
396	ENSMUSG00000068428	Gm606	239789	gene model 606, (NCBI)	16	26.9656	0.653164	7.8851e-07	-0.465528	0.128329	purple	-	-	-	-
397	ENSMUSG00000035638	Muc20	224116	mucin 20	16	32.7863	0.407474	0.00622161	-0.141727	0.295536	purple	-	yes	-	-
398	ENSMUSG00000035578	Iqcg	69707	IQ motif containing G	16	33.0157	0.767395	1.45864e-10	-1.18122	2.96544e-20	purple	-	-	-	yes
399	ENSMUSG00000022805	Spata26	320214	MYCBP-associated, testis expressed 1	16	38.3321	0.614102	6.03673e-06	#N/A	#N/A	purple	-	-	-	-
400	ENSMUSG00000022696	Sidt1	320007	SID1 transmembrane family, member 1	16	44.2405	0.465841	0.0014115	0.307274	0.115825	purple	-	-	Nonsynonymous SNP	-
401	ENSMUSG00000071550	Wdr52	212517	WD repeat domain 52	16	44.4299	0.648764	1.00887e-06	-1.38521	1.11547e-16	purple	-	-	Nonsynonymous SNP	-
402	ENSMUSG00000022652	Morc1	17450	microrchidia 1	16	48.6269	0.571246	4.00864e-05	1.18795	0.00665556	purple	-	yes	-	-
403	ENSMUSG00000050520	Cldn8	54420	claudin 8	16	88.561	0.564514	5.2516e-05	-1.61068	3.83056e-13	purple	-	-	-	-
404	ENSMUSG00000022949	Clic6	209195	chloride intracellular channel 6	16	92.5411	0.612608	6.48425e-06	-1.1046	4.64265e-17	purple	-	-	-	-
405	ENSMUSG00000000385	Tmprss2	50528	transmembrane protease, serine 2	16	97.5649	0.544559	0.000112525	-1.05949	8.57598e-10	purple	-	-	Nonsynonymous SNP	yes
406	ENSMUSG00000023806	Rsph3b	100037282	radial spoke 3B homolog (Chlamydomonas)	17	6.70037	0.320433	0.0356785	0.761416	0.185574	purple	yes	-	Nonsynonymous SNP	-
407	ENSMUSG00000024169	Ift140	106633	intraflagellar transport 140 homolog (Chlamydomonas)	17	25.0964	0.444969	0.00248035	-0.682703	3.49504e-07	purple	-	-	Nonsynonymous SNP	yes
408	ENSMUSG00000024175	Tekt4	71840	tektin 4	17	25.4765	0.370075	0.0140043	0.120356	0.712974	purple	-	yes	Nonsynonymous SNP	yes
409	ENSMUSG00000071202	Ccdc78	381077	coiled-coil domain containing 78	17	25.7869	0.492517	0.000646468	-0.291695	0.226238	purple	-	yes	-	-
410	ENSMUSG00000090113	Nhlrc4	621239	NHL repeat containing 4	17	25.8073	0.373139	0.0131516	-0.154692	0.604864	purple	-	-	-	-
411	ENSMUSG00000073433	Arhgdig	14570	Rho GDP dissociation inhibitor (GDI) gamma	17	26.1993	0.323546	0.0337929	-0.0841828	0.721746	purple	-	-	-	-
412	ENSMUSG00000063239	Grm4	268934	glutamate receptor, metabotropic 4	17	27.4261	0.436686	0.00306934	-1.22182	0.0649442	purple	-	-	-	-
413	ENSMUSG00000062859	Tcp11	21463	t-complex protein 11	17	28.0766	0.52018	0.000265679	-0.469903	0.116198	purple	-	yes	-	-
414	ENSMUSG00000024028	Tff2	21785	trefoil factor 2 (spasmolytic protein 1)	17	31.1411	0.340053	0.0251	-1.00646	0.000538218	purple	-	yes	-	yes
415	ENSMUSG00000024033	Rsph1	22092	radial spoke head 1 homolog (Chlamydomonas)	17	31.2551	0.426968	0.0039122	-0.332078	0.170034	purple	-	-	-	-
416	ENSMUSG00000073424	Cyp4f15	106648	cytochrome P450, family 4, subfamily f, polypeptide 15 (arachidonic acid metabolism)	17	32.7032	0.546356	0.000105301	-1.54378	1.3097e-10	purple	-	yes	-	-
417	ENSMUSG00000079547	H2-DMb1	14999	histocompatibility 2, class II, locus Mb1	17	34.16	0.323653	0.0337293	0.58029	0.00129654	purple	yes	-	Nonsynonymous SNP	-
418	ENSMUSG00000007034	Slc44a4	70129	solute carrier family 44, member 4	17	34.4014	0.482273	0.000879905	0.387972	0.179643	purple	-	-	-	-
419	ENSMUSG00000023949	Tcte1	21645	t-complex-associated testis expressed 1	17	45.5423	0.475629	0.00106859	-0.929887	1.96465e-10	purple	-	-	-	-
420	ENSMUSG00000023966	Rsph9	75564	radial spoke head 9 homolog (Chlamydomonas)	17	45.9976	0.340595	0.0248497	-0.416024	0.00398355	purple	-	-	-	-
421	ENSMUSG00000023999	Kif6	319991	kinesin family member 6	17	49.7483	0.325133	0.0328626	-0.822614	0.00121147	purple	-	-	-	-
422	ENSMUSG00000023931	Efhb	211482	EF hand domain family, member B	17	53.4269	0.445197	0.00246564	-0.137855	0.64433	purple	-	-	-	-
423	ENSMUSG00000062591	Tubb4a	22153	tubulin, beta 4A class IVA	17	56.9406	0.305703	0.0457939	-0.424079	0.0557287	purple	yes	-	-	-
424	ENSMUSG00000045036	Tmem232	381107	transmembrane protein 232	17	65.2565	0.493117	0.000634701	-1.65956	2.12603e-21	purple	-	-	Nonsynonymous SNP	-
425	ENSMUSG00000045761	Fam179a	320159	family with sequence similarity 179, member A	17	71.3639	0.316097	0.0384467	-0.2841	0.038768	purple	-	-	Nonsynonymous SNP	-
426	ENSMUSG00000043705	Capn13	381122	calpain 13	17	73.2991	0.395175	0.00821395	-1.34614	0.0024148	purple	-	yes	-	-
427	ENSMUSG00000033966	Cdkl4	381113	cyclin-dependent kinase-like 4	17	80.525	0.631808	2.50011e-06	-0.801506	5.91572e-05	purple	-	yes	-	-
428	ENSMUSG00000061802	Armc4	74934	armadillo repeat containing 4	18	7.28535	0.398475	0.00763229	-1.21094	8.4972e-09	purple	-	-	-	yes
429	ENSMUSG00000036225	Kctd1	106931	potassium channel tetramerisation domain containing 1	18	14.9694	0.446711	0.0023699	-0.14264	0.486683	purple	-	-	-	-
430	ENSMUSG00000024411	Aqp4	11829	aquaporin 4 (kidney basolateral resorption, astrocyte expressed, neuromyelitis optica)	18	15.4001	0.734337	3.04922e-09	-0.35365	0.0520615	purple	-	-	-	-
431	ENSMUSG00000024376	Epb4.1l4a	13824	erythrocyte protein band 4.1-like 4a	18	33.797	0.528685	0.000198551	-0.304464	0.0362391	purple	-	-	-	-
432	ENSMUSG00000035984	Nme5	75533	expressed in non-metastatic cells 5	18	34.5627	0.677096	1.89104e-07	-0.824622	5.91502e-05	purple	-	-	-	yes
433	ENSMUSG00000024352	Spata24	71242	spermatogenesis-associated protein 24 isoform 2	18	35.6601	0.523456	0.000237734	-0.111426	0.767439	purple	-	yes	-	-
434	ENSMUSG00000024500	Ppp2r2b	72930	protein phosphatase 2 (formerly 2A), regulatory subunit B (PR 52), beta isoform	18	42.6455	0.518785	0.000278442	-0.785762	0.0114164	purple	-	-	-	-
435	ENSMUSG00000038791	Scgb3a2	117158	secretoglobin, family 3A, member 2	18	43.7325	0.682744	1.3191e-07	-2.13988	3.41946e-43	purple	-	-	-	-
436	ENSMUSG00000001700	Gramd3	107022	GRAM domain containing 3	18	56.4854	0.523357	0.000238534	0.782919	1.7679e-07	purple	-	-	-	-
437	ENSMUSG00000026322	Htr4	15562	5 hydroxytryptamine (serotonin) receptor 4	18	62.4964	0.339215	0.0254921	1.07137	0.0270433	purple	-	-	-	-
438	ENSMUSG00000038425	Poli	26447	polymerase (DNA directed), iota	18	70.4746	0.325206	0.0328206	-0.083666	0.674299	purple	-	-	Nonsynonymous SNP	-
439	ENSMUSG00000025420	Katnal2	71206	katanin p60 subunit A-like 2	18	76.9933	0.424862	0.00411929	-0.882928	0.0178749	purple	-	-	Nonsynonymous SNP	-
440	ENSMUSG00000024791	Cdca5	67849	cell division cycle associated 5	19	6.0917	0.348738	0.0213252	0.713874	0.011546	purple	-	yes	-	-
441	ENSMUSG00000090291	Lrrc10b	278795	leucine rich repeat containing 10B	19	10.3809	0.362573	0.01629	-0.760514	0.000785849	purple	-	yes	-	-
442	ENSMUSG00000024697	Gna14	14675	guanine nucleotide binding protein, alpha 14	19	16.6107	0.506035	0.000423144	-0.510619	1.24915e-05	purple	-	yes	-	-
443	ENSMUSG00000024712	Rfk	54391	riboflavin kinase (flavokinase)	19	17.4012	0.332446	0.028844	-0.409596	0.00485373	purple	yes	-	-	-
444	ENSMUSG00000024747	Aldh1a7	26358	aldehyde dehydrogenase family 1, subfamily A7	19	20.6933	0.749836	7.8697e-10	-0.826203	2.25303e-07	purple	-	-	-	-
445	ENSMUSG00000033053	1700028P14Rik	67483	RIKEN cDNA 1700028P14 gene	19	23.5588	0.39478	0.00828607	0.0919171	0.868167	purple	-	yes	Nonsynonymous SNP	-
446	ENSMUSG00000064202	4430402I18Rik	381218	RIKEN cDNA 4430402I18 gene	19	28.9235	0.458424	0.00173243	-0.960759	2.06801e-06	purple	-	-	-	-
447	ENSMUSG00000024768	Lipf	67717	lipase, gastric	19	33.9735	0.517685	0.000288899	-1.24787	0.0134158	purple	-	-	-	-
448	ENSMUSG00000009378	Slc16a12	240638	solute carrier family 16 (monocarboxylic acid transporters), member 12	19	34.6684	0.481906	0.000889509	-1.05344	2.63136e-07	purple	-	-	-	-
449	ENSMUSG00000064105	Cnnm2	94219	cyclin M2	19	46.8785	0.518239	0.000283588	0.0338476	0.888496	purple	-	yes	Nonsynonymous SNP	-
450	ENSMUSG00000044948	Wdr96	414801	inositol 1,4,5-triphosphate receptor interacting protein	19	47.7485	0.485755	0.000793335	-1.23601	8.13826e-16	purple	-	-	Nonsynonymous SNP	-
451	ENSMUSG00000046585	Ccdc147	381229	coiled-coil domain containing 147	19	47.8632	0.377156	0.0121005	-0.921159	0.000492169	purple	-	-	-	-
452	ENSMUSG00000042179	Pnliprp1	18946	pancreatic lipase related protein 1	19	58.7441	0.316925	0.0379053	-1.36507	0.0289858	purple	-	-	-	-
453	ENSMUSG00000025092	Hspa12a	73442	heat shock protein 12A	19	58.796	0.377456	0.0120249	-0.298344	0.0175171	purple	-	yes	Nonsynonymous SNP	-
454	ENSMUSG00000048029	Eno4	226265	enolase 4	19	58.8689	0.551483	8.69296e-05	-0.983361	1.48858e-09	purple	-	-	-	yes
455	ENSMUSG00000025038	Efhc2	74405	EF-hand domain (C-terminal) containing 2	X	17.1323	0.353217	0.0195702	-1.07464	0.00368312	purple	-	-	-	-
456	ENSMUSG00000036551	Akap14	434756	A kinase (PRKA) anchor protein 14	X	39.7975	0.672753	2.47881e-07	-1.77223	1.86172e-19	purple	-	yes	-	-
457	ENSMUSG00000035246	Pcyt1b	236899	phosphate cytidylyltransferase 1, choline, beta isoform	X	93.7498	0.545368	0.00010922	-0.85466	0.000169702	purple	-	yes	-	-
458	ENSMUSG00000031438	Rnf128	66889	ring finger protein 128	X	139.672	0.481612	0.000897256	-0.773632	2.81001e-05	purple	-	yes	-	yes
459	ENSMUSG00000047230	Cldn2	12738	claudin 2	X	139.811	0.504618	0.000442771	2.46104	2.50169e-27	purple	-	-	-	-
460	ENSMUSG00000047485	Klhl34	245683	kelch-like 34 (Drosophila)	X	157.82	0.45348	0.00198035	0.463728	0.733971	purple	-	-	-	-
461	ENSMUSG00000025658	Cnksr2	245684	connector enhancer of kinase suppressor of Ras 2	X	157.822	0.57018	4.18567e-05	-1.48001	1.46384e-11	purple	-	-	-	-
462	ENSMUSG00000015405	Ace2	70008	angiotensin I converting enzyme (peptidyl-dipeptidase A) 2	X	164.188	1	0	-0.612227	9.87745e-05	purple	-	-	-	yes
